# Supplementary material for: Multimodal Neural Network for Rapid Serial Visual Presentation Brain Computer Interface
Source: PubMed Central journal article supplement (PMC5168930; doi:10.3389/fncom.2016.00130), 2016-12-20
Supplement: Image3.pdf [file Image3.pdf]

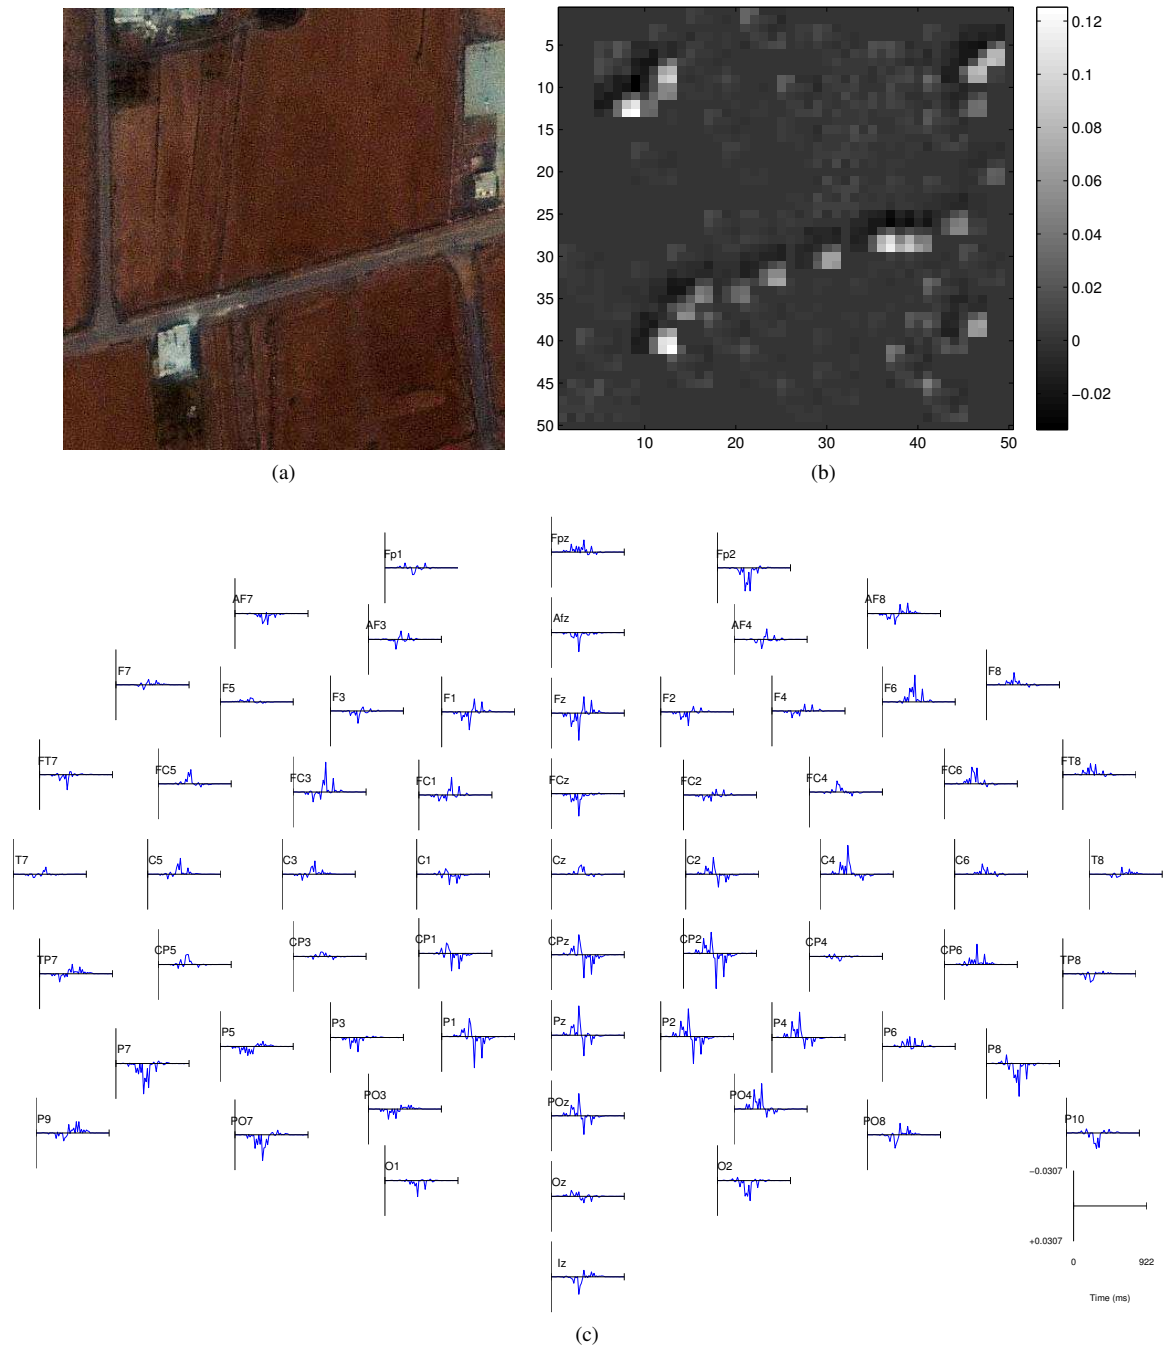

**Figure S3.** Visualization for a sample input. (a) the input image. (b) image saliency map. (c) EEG saliency map scalp plot.
