# Supplementary material for: Multimodal Neural Network for Rapid Serial Visual Presentation Brain Computer Interface
Source: PubMed Central journal article supplement (PMC5168930; doi:10.3389/fncom.2016.00130), 2016-12-20
Supplement: Image4.pdf [file Image4.pdf]

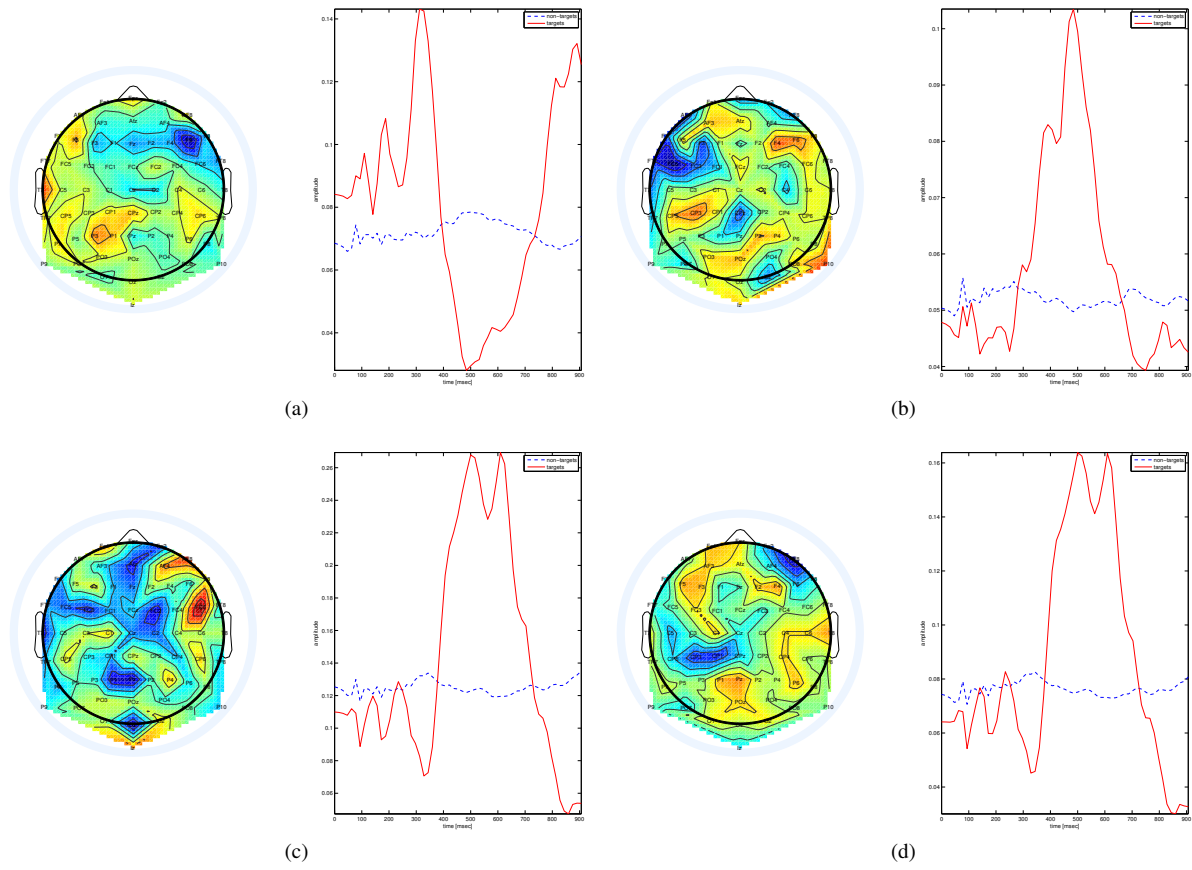

**Figure S4.** Weights of the first convolutional layer in the EEG network from several subjects/sessions, where we can see the variability across the data.
